# Supplementary material for: The plasma membrane calcium ATPase 4 does not influence parasite levels but partially promotes experimental cerebral malaria during murine blood stage malaria
Source: Springer Nature journal article supplement (doi:10.1186/s12936-021-03832-w), 2021-07-02
Supplement: MOESM1 [file 19323548]

## Supplementary Figures

**The calcium pump ATPase 4 does not influence parasite levels but partially promotes experimental cerebral malaria during murine blood stage malaria**

Ana Villegas-Mendez<sup>1</sup>, Nicholas Stafford<sup>2</sup>, Michael J. Haley<sup>1</sup>, Normalita Eka Pravitasari<sup>3</sup>,  
Florence Baudoin<sup>2</sup>, Adnan Ali<sup>4,5</sup>, Puji Budi Setia Asih<sup>3</sup>, Josephine E. Siregar<sup>3</sup>, Esther  
Baena<sup>4</sup>, Din Syafruddin<sup>3</sup>, Kevin N. Couper<sup>1,\*</sup>, Delvac Oceandy<sup>2,\*</sup>

**Running title:** PMCA4 ablation in malaria infection

## Supplementary figure 1

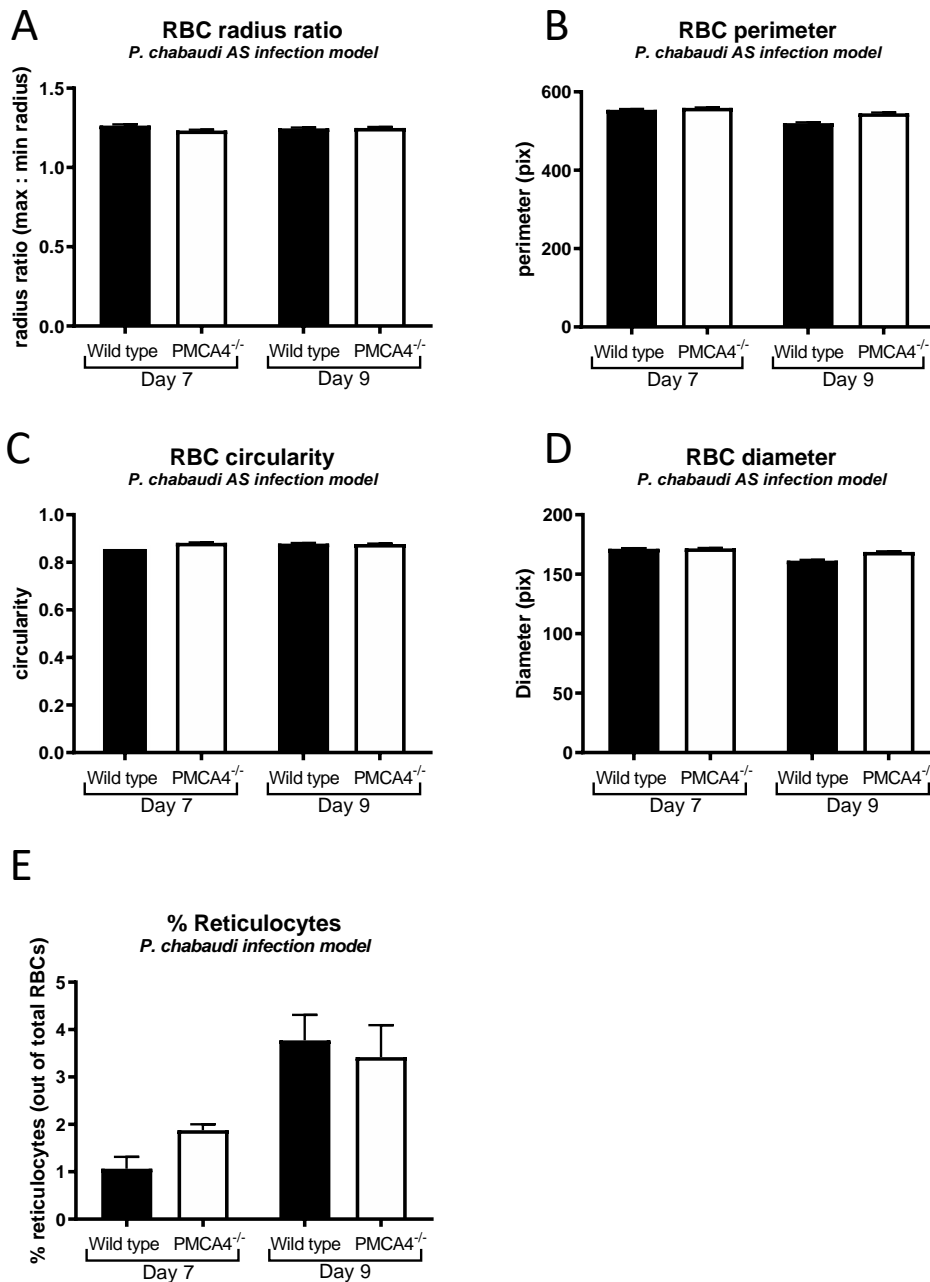

**Supplementary Figure 1: Analysis of RBCs during *P. chabaudi* AS infection.** RBCs of the Giemsa-stained thin blood smears from WT and PMCA4<sup>-/-</sup> mice on days 7 and 9 of *P. chabaudi* AS infection were analysed using Image Pro Premier image analysis software. There was no marked difference on **A)** RBC radius ratio, **B)** RBC perimeter, **C)** RBC circularity and **D)** RBC diameter between WT and PMCA4<sup>-/-</sup> mice at days 7 and 9 of *P. chabaudi* AS infection. **E)** Relative frequency of reticulocytes was analysed on the Giemsa-stained blood smears. No difference in reticulocytes proportion between WT and PMCA4<sup>-/-</sup> mice at days 7 and 9 following *P. chabaudi* AS infection. A total of 38 fields of view from 3 mice per group per time point was analysed.

## Supplementary figure 2

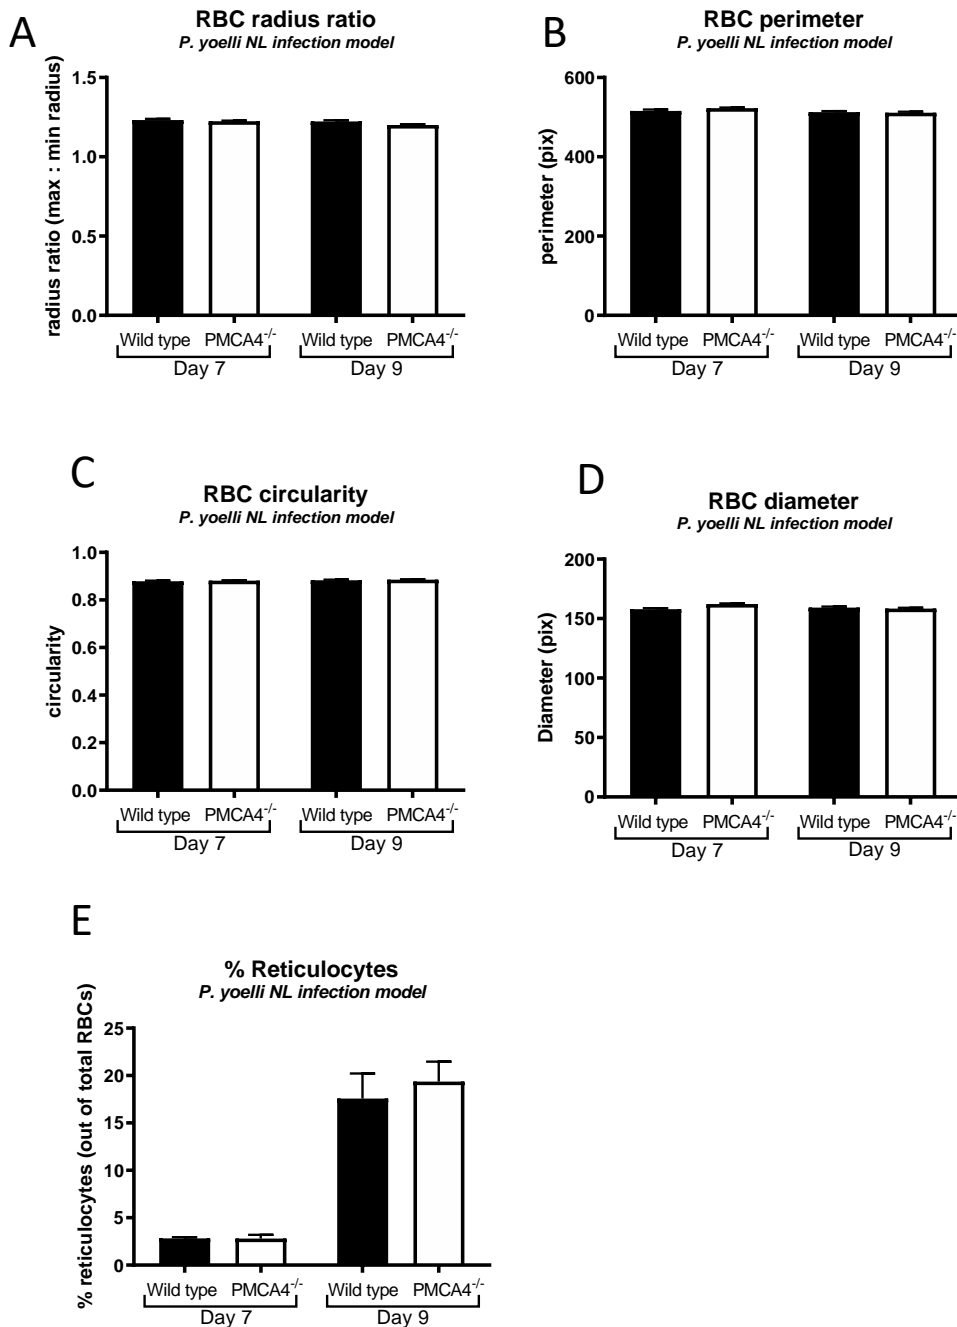

### Supplementary Figure 2: Analysis of RBCs during *P. yoelii* NL infection.

Computational analysis of RBCs showed that there was no marked difference on **A)** RBC radius ratio, **B)** RBC perimeter, **C)** RBC circularity and **D)** RBC diameter between WT and PMCA4<sup>-/-</sup> mice at days 7 and 9 of *P. yoelii* NL infection. **E)** Consistent with the data from *P. chabaudi* AS model there was no difference in reticulocytes proportion between WT and PMCA4<sup>-/-</sup> mice at days 7 and 9 following *P. yoelii* NL infection. A total of 38 fields of view from 3 mice per group per time point was analysed.

### Supplementary figure 3

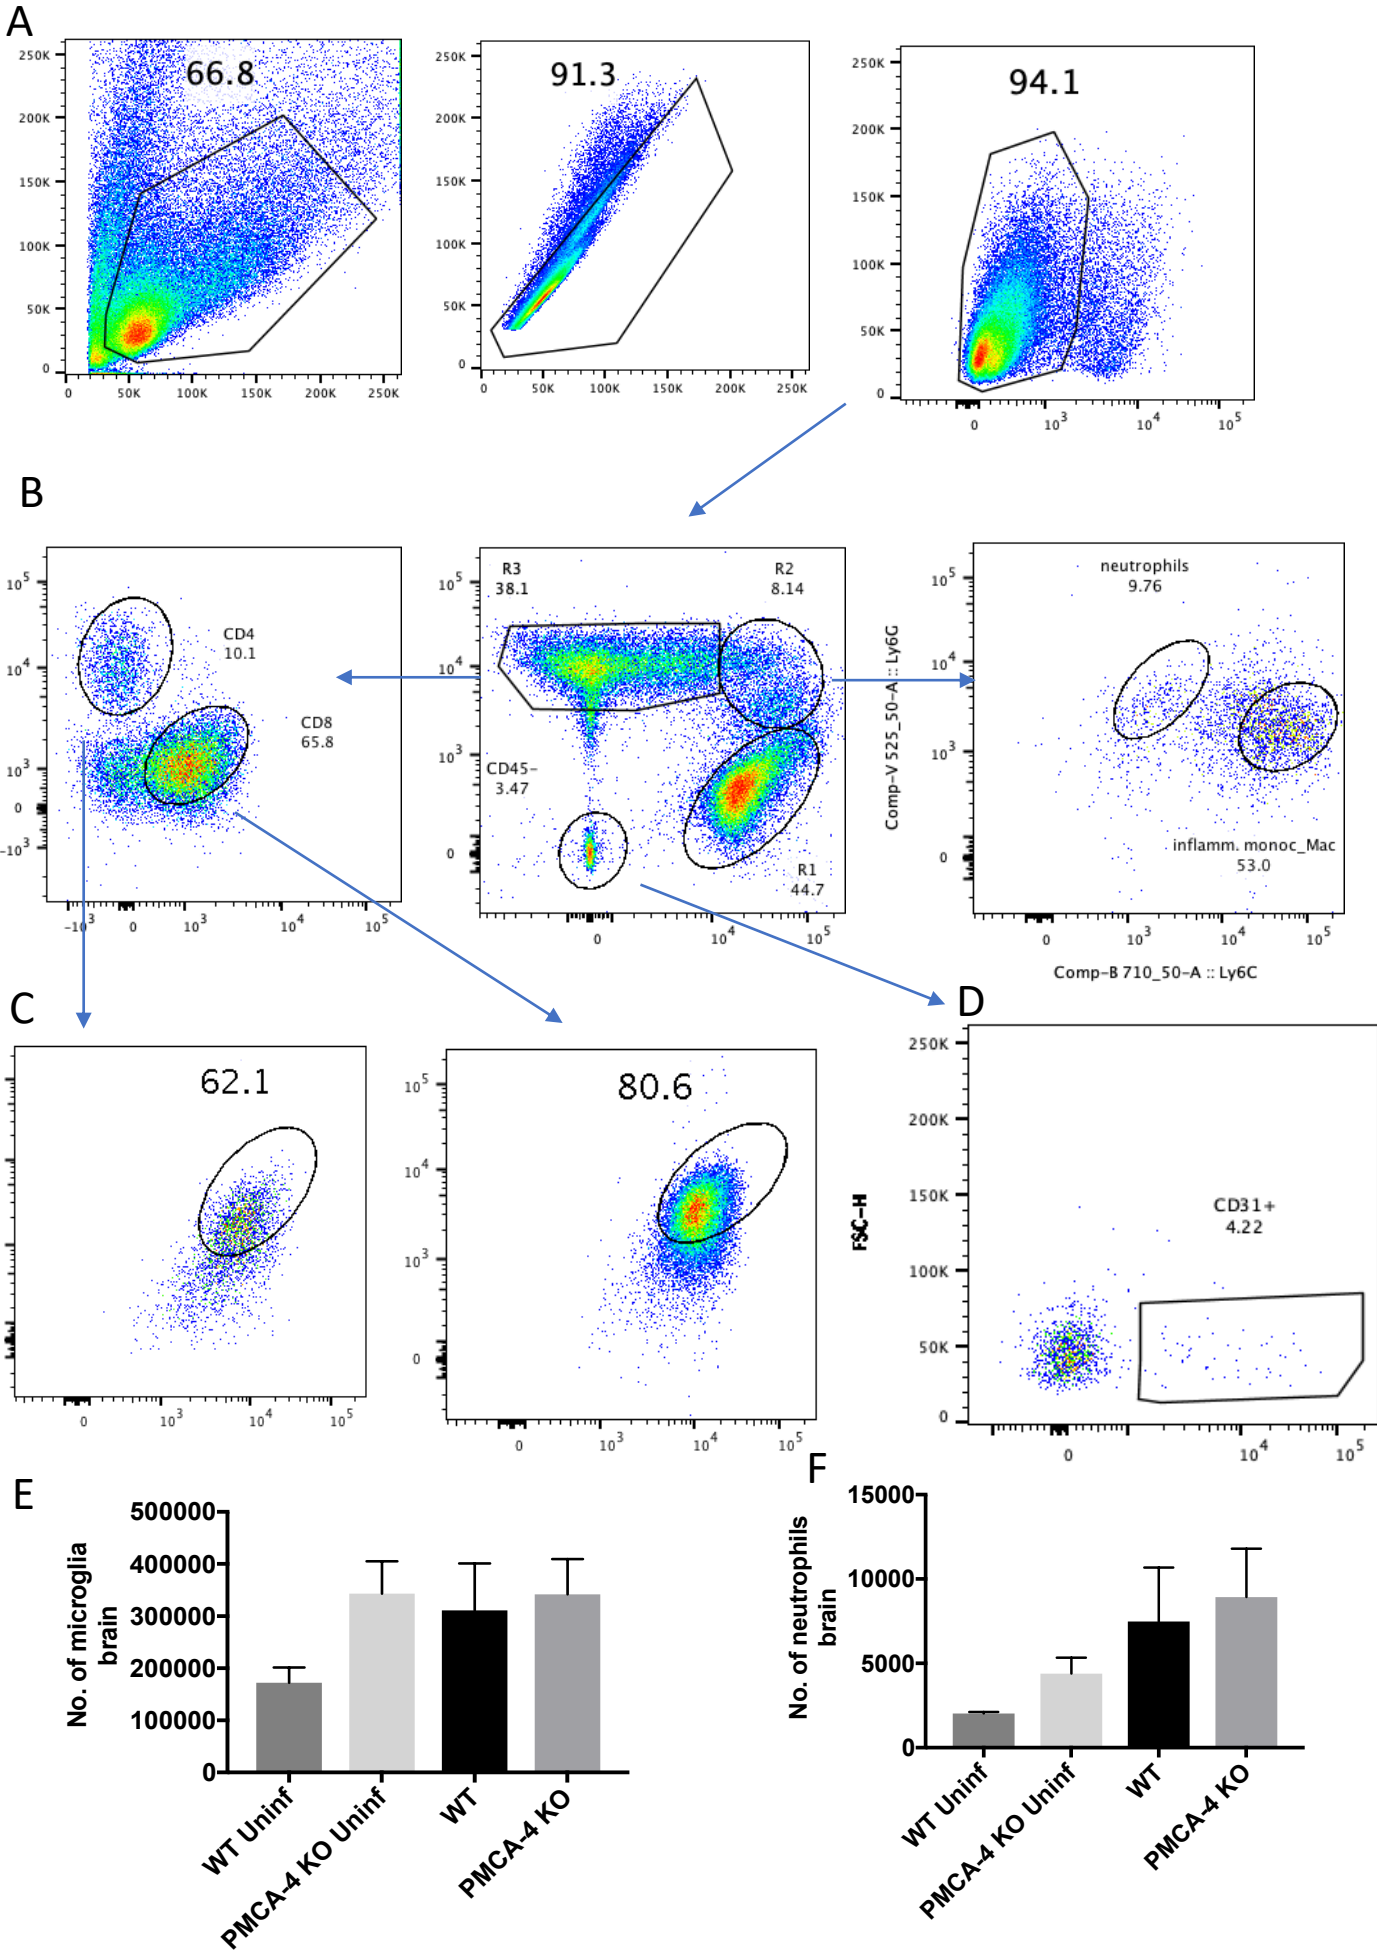

### **Supplementary Figure 3. The gating strategy for cells within the brain.**

Representative flow cytometry plots showing in order: (A) gating of single cells, singlets and live cells. (B) Gating of CD45<sup>+</sup>CD11b<sup>-</sup> (R3) populations, CD45<sup>+</sup>CD11b<sup>+</sup> (R2) populations, CD45<sup>low</sup>, CD11b<sup>+</sup> (R1) microglial cells and CD45<sup>-</sup>CD11b<sup>-</sup> cells. R2 cells were gated into Ly6G<sup>+</sup>Ly6C<sup>low</sup> Neutrophils and Ly6C<sup>+</sup>Ly6G<sup>low</sup> inflammatory monocytes. R3 cells were gated into CD4<sup>+</sup> and CD8<sup>+</sup> cells. (C) Granzyme B expression by CD4<sup>+</sup> and CD8<sup>+</sup> cells. (D) Identification of CD31<sup>+</sup> endothelial cells within CD45<sup>-</sup>CD11b<sup>-</sup> population. (E, F) The calculated numbers of microglia and neutrophils within the brain in uninfected WT and PMCA-4 KO mice and mice infected with 10<sup>4</sup> *P. berghei* ANKA pRBCs (analysis on day 6 of infection).
